# Supplementary material
Source: publisher site journal article supplement (https://www.dovepress.com/article/293166)
Supplement: Supplementary file 1 [file get_supplementary_file.php]

**Appendix 1.** Oswestry Disability Index.

Section 1: Pain Intensity

□ I can tolerate the pain I have without having to use pain killers. [0 points]

□ The pain is bad but I manage without taking pain killers. [1 point]

□ Pain killers give complete relief from pain . [2 points]

□ Pain killers give moderate relief from pain. [3 points ]

□ Pain killers give very little relief from pain. [4 points]

□ Pain killers have no effect on the pain and I do not use them. [5 points]

Section 2: Personal Care

□ I can look after myself normally without causing extra pain. [0 points]

□ I can look after myself normally but it causes extra pain. [1 point]

□ It is painful to look after myself and I am slow and careful. [2 points]

□ I need some help but manage most of my personal care. [3 points]

□ I need help every day in most aspects of self care. [4 points]

□ I do not get dressed wash with difficulty and stay in bed. [5 points]

Section 3: Lifting

□ I can lift heavy weights without extra pain. [0 points]

□ I can lift heavy weights but it gives extra pain. [1 point]

□ Pain prevents me from lifting heavy weights off the floor but I can manage if they are conveniently positioned for example on a table. [2 points]

□ Pain prevents me from lifting heavy weights but I can manage light to medium weights if they are conveniently positioned. [3 points]

□ I can lift only very light weights. [4 points]

□ I cannot lift or carry anything at all. [5 points]

Section 4: Walking

□ Pain does not prevent me walking any distance. [0 points]

□ Pain prevents me walking more than 1 mile. [1 point]

□ Pain prevents me walking more than 0.5 miles. [2 points]

□ Pain prevents me walking more than 0.25 miles. [3 points]

□ I can only walk using a stick or crutches. [4 points]

□ I am in bed most of the time and have to crawl to the toilet. [5 points]

Section 5: Sitting

□ I can sit in any chair as long as I like. [0 points]

□ I can only sit in my favorite chair as long as I like. [1 point]

□ Pain prevents me sitting more than 1 hour. [2 points]

□ Pain prevents me from sitting more than 0.5 hours. [3 points]

□ Pain prevents me from sitting more than 10 minutes. [4 points]

□ Pain prevents me from sitting at all. [5 points]

Section 6: Standing

□ I can stand as long as I want without extra pain. [0 points]

□ I can stand as long as I want but it gives me extra pain. [1 point]

□ Pain prevents me from standing for more than 1 hour. [2 points]

□ Pain prevents me from standing for more than 30 minutes. [3 points]

□ Pain prevents me from standing for more than 10 minutes. [4 points]

□ Pain prevents me from standing at all. [5 points]

Section 7: Sleeping

□ Pain does not prevent me from sleeping well. [0 points]

□ I can sleep well only by using tablets. [1 point]

□ Even when I take tablets I have less than 6 hours sleep. [2 points]

□ Even when I take tablets I have less than 4 hours sleep. [3 points]

□ Even when I take tablets I have less than 2 hours of sleep. [4 points]

□ Pain prevents me from sleeping at all. [5 points]

Section 8: Sex Life

□ My sex life is normal and causes no extra pain. [0 points]

□ My sex life is normal but causes some extra pain. [1 point]

□ My sex life is nearly normal but is very painful. [2 points]

□ My sex life is severely restricted by pain. [3 points]

□ My sex life is nearly absent because of pain. [4 points]

□ Pain prevents any sex life at all. [5 points]

Section 9: Social Life

□ My social life is normal and gives me no extra pain. [0 points]

□ My social life is normal but increases the degree of pain. [1 point]

□ Pain has no significant effect on my social life apart from limiting energetic interests such as dancing. [2 points]

□ Pain has restricted my social life and I do not go out as often. [3 points]

□ Pain has restricted my social life to my home. [4 points]

□ I have no social life because of pain. [5 points]

Section 10: Traveling

□ I can travel anywhere without extra pain. [0 points]

□ I can travel anywhere but it gives me extra pain. [1 point]

□ Pain is bad but I manage journeys over 2 hours. [2 points]

□ Pain restricts me to journeys of less than 1 hour. [3 points]

□ Pain restricts me to short necessary journeys under 30 minutes. [4 points]

□ Pain prevents me from traveling except to the doctor or hospital. [5 points]

**Appendix 2.** Roland-Morris Disability Questionnaire.

1. □ I stay at home most of the time because of my back.

2. □ I change position frequently to try to get my back comfortable.

3. □ I walk more slowly than usual because of my back.

4. □ Because of my back, I am not doing any jobs that I usually do around the house.

5. □ Because of my back, I use a handrail to get upstairs.

6. □ Because of my back, I lie down to rest more often.

7. □ Because of my back, I have to hold on to something to get out of an easy chair.

8. □ Because of my back, I try to get other people to do things for me.

9. □ I get dressed more slowly than usual because of my back.

10. □ I only stand up for short periods of time because of my back.

11. □ Because of my back, I try not to bend or kneel down.

12. □ I find it difficult to get out of a chair because of my back.

13. □ My back is painful almost all of the time.

14. □ I find it difficult to turn over in bed because of my back.

15. □ My appetite is not very good because of my back.

16. □ I have trouble putting on my socks (or stockings) because of the pain in my back.

17. □ I can only walk short distances because of my back pain.

18. □ I sleep less well because of my back.

19. □ Because of my back pain, I get dressed with the help of someone else.

20. □ I sit down for most of the day because of my back.

21. □ I avoid heavy jobs around the house because of my back.

22. □ Because of back pain, I am more irritable and bad tempered with people than usual.

23. □ Because of my back, I go upstairs more slowly than usual.

24. □ I stay in bed most of the time because of my back.
